# Supplementary material
Source: PubMed Central journal article supplement (PMC5528690)
Supplement: MOL2-9-068-s001.pdf [file MOL2-9-068-s001.pdf]

## **SUPPLEMENTARY MATERIAL**

### **Development and validation of a microRNA based diagnostic assay for primary tumor site classification of liver core biopsies.**

Katharina Perell, Martin Vincent, Ben Vainer, Bodil Laub Petersen, Birgitte Federspiel, Anne Kirstine Møller, Mette Madsen, Niels Richard Hansen, Lennart Friis-Hansen, Finn Cilius Nielsen, Gedske Daugaard.

#### **miRNA Quantitative real-time PCR profiling**

TaqMan low density array (TLDA) cards, human MicroRNA array A (Applied Biosystems) were used to determine the expression of 377 microRNAs. Each array contains six positive controls. RT-PCR reactions were performed according to the manufacturer's instructions. All reagents were obtained from Applied Biosystems. Briefly, 30 ng of total RNA was reverse transcribed (RT) with Megaplex RT primer human pool A and the TaqMan miRNA reverse transcription kit in a total volume of 7.5 µl per reaction. The amount of miRNA that can be extracted from core biopsies may be limited, and a 40 round pre-amplification step was therefore included. cDNA of liver core biopsies as well as primary tumor resections was pre-amplified in order to make the analysis from primary tumors and metastases comparable. Pre-amplification was performed using 2.5 µl RT product together with Megaplex PreAmp Primers and TaqMan PreAmp Master Mix in a 25 µl PCR reaction. Given that the FFPE tissue was not collected with RNA preservation in mind, we used the expression of the small nucleolar RNA, RNU44, as a surrogate measure of RNA integrity prior to miRNA quantification. RNU44 expression was examined in triplicate in the pre-amplified cDNA-mix using a 384-well plate. Each reaction consisted of 2.5 µl pre-amplified cDNA, 0.5 µl TaqMan MicroRNA assay, 5 µl Universal Master Mix No AmpErase UNG and 2 µl Nuclease-free water (all from Applied Biosystems). PCR reactions were run on an Applied Biosystems 7900 HT system, according to the manufacturer's instructions and analyzed using SDS software (v.2.4, automatic baseline setting). Based on preliminary results, we defined a mean cycle threshold (Ct) value  $\leq 20$  as a cut-off and only samples with Ct values below this cut-off were further processed. Pre-amplified cDNA was diluted with 375 µl 0.1 TE (ph. 8.0) and transferred to a TaqMan Human MicroRNA A array (v. 2.0). Quantitative real-time PCR was performed using an Applied Biosystems ViiA 7 Real Time PCR and TaqMan Advanced Master Mix with 50 µl input cDNA template per lane. Ct values were calculated using the ViiA 7 software (v. 1.1).

Successful analysis was performed for 333 samples (98.5 %). Five samples were excluded because the RNU44 Ct-values were above the predefined cut-off.

Supplementary Figure S1

|                               |              | Reference diagnosis |        |     |     |     |     |              |      |          |          |
|-------------------------------|--------------|---------------------|--------|-----|-----|-----|-----|--------------|------|----------|----------|
|                               |              | Bladder             | Breast | CCA | CRC | GC  | HCC | Normal liver | Lung | Pancreas | Squamous |
| Predicted diagnosis           | Bladder      | 17                  | 0      | 0   | 0   | 0   | 0   | 0            | 0    | 0        | 1        |
|                               | Breast       | 0                   | 16     | 0   | 0   | 0   | 0   | 0            | 2    | 0        | 1        |
|                               | CCA          | 0                   | 0      | 14  | 0   | 1   | 1   | 0            | 0    | 0        | 0        |
|                               | CRC          | 0                   | 0      | 0   | 19  | 1   | 0   | 0            | 0    | 0        | 0        |
|                               | GC           | 0                   | 0      | 0   | 1   | 16  | 0   | 0            | 0    | 0        | 0        |
|                               | HCC          | 0                   | 0      | 0   | 0   | 0   | 14  | 0            | 0    | 0        | 0        |
|                               | Normal liver | 0                   | 0      | 2   | 0   | 0   | 2   | 37           | 0    | 0        | 0        |
|                               | Lung         | 0                   | 0      | 1   | 0   | 0   | 0   | 0            | 14   | 1        | 1        |
|                               | Pancreas     | 0                   | 0      | 3   | 0   | 0   | 0   | 0            | 1    | 19       | 0        |
|                               | Squamous     | 0                   | 1      | 0   | 0   | 0   | 0   | 0            | 0    | 0        | 13       |
| Positive percentage agreement |              | 100%                | 94%    | 70% | 95% | 89% | 82% | 100%         | 82%  | 95%      | 81%      |

**Supplementary Figure S1. Confusion matrix showing PRIM classifier predictions upon cross-validation.** Primary tumor site predictions of the PRIM classifier obtained by cross-validation are shown. The PRIM classifier was trained on primary tumor and normal liver resections only. Classes according to the reference diagnosis are shown along the columns and classes according to classifier predictions are shown along the rows. The positive percentage agreement for each assay class was calculated.

**Squamous**, squamous cell carcinoma (mixed population); **CCA**, cholangiocarcinoma; **CRC**, Colorectal carcinoma; **GC**, gastric or cardia carcinoma; **HCC**, hepatocellular carcinoma.

Supplementary Figure S2

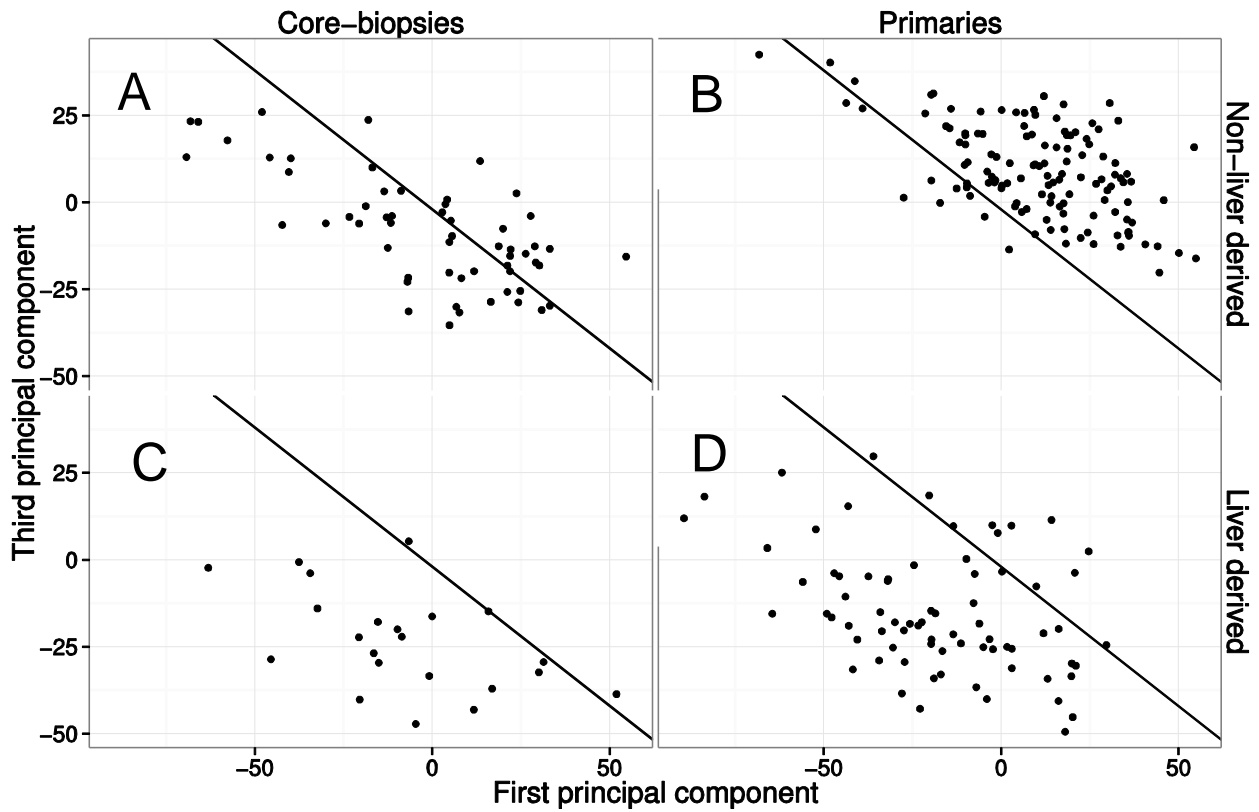

**Supplementary Figure S2. Principal Component Plot illustrating the clustering of training samples.** Training samples were divided according to: **A)** Core biopsies from non-liver derived malignancies representing metastases from bladder, breast, colorectal, gastric/cardia, lung, pancreatic cancer and mixed primary tumors of squamous cell morphology (57 samples). **B)** Resected non-liver derived malignancies constituting primary tumors from the same 7 classes mentioned above (125 samples). **C)** Core biopsies from liver derived malignancies (hepatocellular carcinoma, cholangiocarcinoma) and normal liver (reactive and cirrhotic) (22 samples). **D)** Resected liver-derived malignancies and normal liver (74 samples).

Supplementary Figure S3

|                               |              | Reference diagnosis |        |      |     |     |     |              |      |          |          |
|-------------------------------|--------------|---------------------|--------|------|-----|-----|-----|--------------|------|----------|----------|
|                               |              | Bladder             | Breast | CCA  | CRC | GC  | HCC | Normal liver | Lung | Pancreas | Squamous |
| Predicted diagnosis           | Bladder      | 1                   | 0      | 0    | 0   | 0   | 0   | 0            | 0    | 0        | 1        |
|                               | Breast       | 0                   | 4      | 0    | 0   | 0   | 0   | 0            | 0    | 1        | 0        |
|                               | CCA          | 0                   | 1      | 4    | 0   | 1   | 0   | 2            | 1    | 0        | 0        |
|                               | CRC          | 0                   | 0      | 0    | 8   | 2   | 0   | 0            | 0    | 1        | 0        |
|                               | GC           | 0                   | 1      | 0    | 3   | 8   | 0   | 0            | 0    | 2        | 2        |
|                               | HCC          | 0                   | 0      | 0    | 0   | 0   | 1   | 0            | 0    | 0        | 0        |
|                               | Normal liver | 0                   | 0      | 0    | 0   | 0   | 2   | 13           | 0    | 1        | 0        |
|                               | Lung         | 0                   | 1      | 0    | 0   | 0   | 0   | 0            | 1    | 0        | 0        |
|                               | Pancreas     | 0                   | 0      | 0    | 1   | 1   | 0   | 0            | 0    | 4        | 0        |
|                               | Squamous     | 1                   | 0      | 0    | 0   | 0   | 0   | 0            | 0    | 1        | 9        |
| Positive percentage agreement |              | 50%                 | 57%    | 100% | 67% | 67% | 33% | 87%          | 50%  | 40%      | 75%      |

**Supplementary Figure S3. Confusion matrix showing CCM+CB classifier predictions upon 8-fold cross-validation.** Cross-validation was performed on 79 liver core biopsies. Each assay class was represented by 2-12 samples. Each row and column corresponds to one of the assay classes included in the classifier. Columns indicate classes according to the reference diagnosis; rows indicate the diagnosis predicted by the CCM+CB classifier. Numbers on the diagonal indicate cases for which the predicted diagnosis matched the reference diagnosis, whereas off-diagonal numbers were in disagreement and counted as test errors. The positive percentage agreement for each class was calculated.

**Squamous**, squamous cell carcinoma (mixed population); **CCA**, cholangiocarcinoma; **CRC**, colorectal carcinoma; **GC**, gastric or cardia carcinoma; **HCC**, hepatocellular carcinoma.

## Supplementary Figure S4

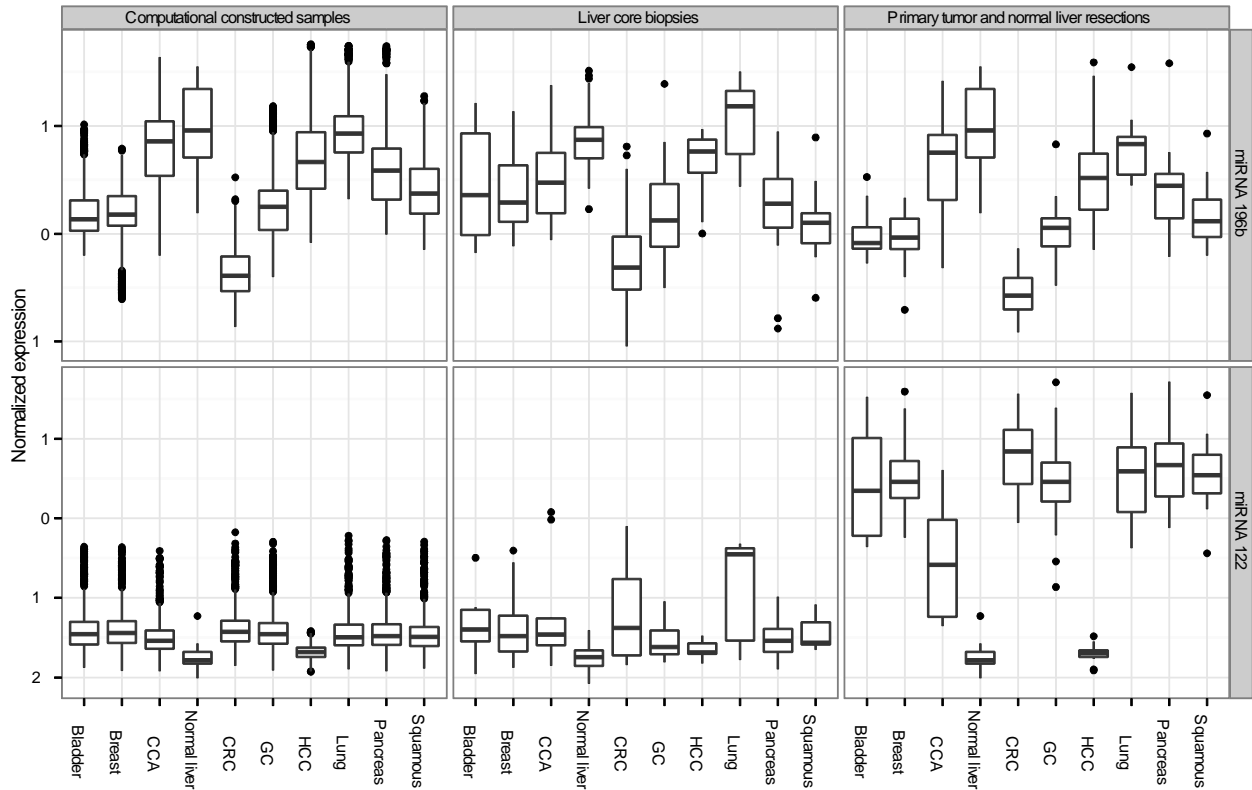

**Supplementary Figure S4. Normalized expression profiles of miR-122 and miR-196b in computational constructed samples, liver core biopsies and primary tumor and normal liver resections.** Expression profiles below 0 indicate that the miRNA is up-regulated. Accordingly, miR-196b is shown to be up-regulated in colorectal cancer in all three sample sets. This miR is selected as part of the classification signature in all three classifiers (PRIM, CCM, CCM+CB). In contrast, miR-122 is up regulated in normal liver (reactive liver and cirrhosis) HCC and CCA which makes it an excellent discriminative miRNA in the PRIM classifier, but in samples with liver contamination, the predictive ability diminishes.

**CCA:** cholangiocarcinoma; **CRC:** colorectal carcinoma; **GC:** gastric or cardia carcinoma; **HCC:** hepatocellular carcinoma.

## Supplementary Table S1.

Comparison of classifier predictions for 134 liver core biopsies.

| Reference Class | Sample age | Tumor % | T/V  | PRIM      | CCM       | CCM+CB    |
|-----------------|------------|---------|------|-----------|-----------|-----------|
| Bladder         | 2008       | 10 %    | Test | CCA       | Squamous  | Squamous  |
| Bladder         | 2006       | 30 %    | Test | Liver     | Liver     | Bladder   |
| CCA             | 2006       | 35 %    | Test | CCA       | CCA       | CCA       |
| CCA             | 2010       | 80 %    | Test | CCA       | CCA       | CCA       |
| CCA             | 2007       | 30 %    | Test | CCA       | Cirrhosis | CCA       |
| CCA             | 2010       | 40 %    | Test | CCA       | Squamous  | CCA       |
| Cirrhosis       | 2077       | None    | Test | Cirrhosis | Cirrhosis | CCA       |
| Cirrhosis       | 2010       | None    | Test | Cirrhosis | CCA       | CCA       |
| Cirrhosis       | 2006       | None    | Test | CCA       | Liver     | Liver     |
| Cirrhosis       | 2008       | None    | Test | Cirrhosis | Cirrhosis | Cirrhosis |
| Cirrhosis       | 2011       | None    | Test | Cirrhosis | Cirrhosis | Cirrhosis |
| Cirrhosis       | 2011       | None    | Test | Cirrhosis | Cirrhosis | Cirrhosis |
| Cirrhosis       | 2011       | None    | Test | Cirrhosis | Cirrhosis | Cirrhosis |
| Cirrhosis       | 2008       | None    | Test | Liver     | Cirrhosis | Cirrhosis |
| CRC             | 2010       | 50 %    | Test | CRC       | CRC       | CRC       |
| CRC             | 2010       | 25 %    | Test | Liver     | CRC       | GC        |
| CRC             | 2010       | 100 %   | Test | CRC       | CRC       | CRC       |
| CRC             | 2007       | 25 %    | Test | CRC       | CRC       | CRC       |
| CRC             | 2005       | 40 %    | Test | CRC       | CRC       | CRC       |
| CRC             | 2011       | 50 %    | Test | CRC       | CRC       | CRC       |
| CRC             | 2010       | 75 %    | Test | Liver     | GC        | GC        |
| CRC             | 2010       | 25 %    | Test | CRC       | CRC       | CRC       |
| CRC             | 2010       | 100 %   | Test | CRC       | CRC       | CRC       |
| CRC             | 2006       | 20 %    | Test | CCA       | CCA       | Pancreas  |
| CRC             | 2008       | 100 %   | Test | CRC       | CRC       | CRC       |
| CRC             | 2003       | 40 %    | Test | Liver     | Lung      | GC        |

|        |      |       |      |           |           |           |
|--------|------|-------|------|-----------|-----------|-----------|
| GC     | 2008 | 30 %  | Test | CCA       | GC        | GC        |
| GC     | 2008 | 50 %  | Test | GC        | GC        | Squamous  |
| GC     | 2008 | 50 %  | Test | Liver     | GC        | GC        |
| GC     | 2009 | 40 %  | Test | Liver     | CRC       | CRC       |
| GC     | 2010 | 40 %  | Test | CCA       | CCA       | GC        |
| GC     | 2004 | 80 %  | Test | CCA       | CCA       | CCA       |
| GC     | 2008 | 70 %  | Test | Liver     | GC        | GC        |
| GC     | 2011 | 90 %  | Test | Liver     | Breast    | Pancreas  |
| GC     | 2010 | 100 % | Test | CCA       | GC        | GC        |
| GC     | 2010 | 20 %  | Test | GC        | GC        | GC        |
| GC     | 2010 | 20 %  | Test | Liver     | GC        | GC        |
| GC     | 2010 | 40 %  | Test | CCA       | GC        | GC        |
| HCC    | 2009 | 15 %  | Test | Cirrhosis | Cirrhosis | Cirrhosis |
| HCC    | 2010 | 90 %  | Test | HCC       | HCC       | HCC       |
| HCC    | 2009 | 60 %  | Test | Cirrhosis | Cirrhosis | Cirrhosis |
| Liver  | 2008 | None  | Test | Liver     | Liver     | Liver     |
| Liver  | 2007 | None  | Test | Liver     | Liver     | Liver     |
| Liver  | 2011 | None  | Test | Cirrhosis | Liver     | Cirrhosis |
| Liver  | 2008 | None  | Test | Liver     | Liver     | Liver     |
| Liver  | 2008 | None  | Test | Liver     | Liver     | Liver     |
| Liver  | 2009 | None  | Test | Liver     | Liver     | Liver     |
| Liver  | 2010 | None  | Test | Liver     | Liver     | Liver     |
| Lung   | 2008 | 75 %  | Test | Lung      | Lung      | Lung      |
| Lung   | 2011 | 30 %  | Test | Liver     | CCA       | CCA       |
| Breast | 2010 | 40 %  | Test | Cirrhosis | Cirrhosis | CCA       |
| Breast | 2005 | 100 % | Test | Pancreas  | Pancreas  | Breast    |
| Breast | 2002 | 40 %  | Test | Breast    | CCA       | CCA       |
| Breast | 2002 | 40 %  | Test | Liver     | Lung      | Breast    |
| Breast | 2009 | 30 %  | Test | HCC       | GC        | GC        |
| Breast | 2002 | 100 % | Test | Breast    | Liver     | Breast    |

|                        |      |      |            |           |           |           |
|------------------------|------|------|------------|-----------|-----------|-----------|
| Breast                 | 2010 | 15 % | Test       | Liver     | Liver     | Breast    |
| Pancreas               | 2010 | 90 % | Test       | Pancreas  | Pancreas  | Pancreas  |
| Pancreas               | 2010 | 80 % | Test       | CCA       | Liver     | Liver     |
| Pancreas               | 2008 | 25 % | Test       | Cirrhosis | Pancreas  | Pancreas  |
| Pancreas               | 2011 | 25 % | Test       | CCA       | CCA       | Pancreas  |
| Pancreas               | 2011 | 80 % | Test       | CCA       | Pancreas  | Pancreas  |
| Pancreas               | 2008 | 90 % | Test       | CRC       | CRC       | CRC       |
| Pancreas               | 2011 | 35 % | Test       | Liver     | GC        | GC        |
| Pancreas               | 2011 | 25 % | Test       | HCC       | Bladder   | Squamous  |
| Pancreas               | 2011 | 95 % | Test       | CCA       | GC        | GC        |
| Pancreas               | 2008 | 50 % | Test       | CCA       | Breast    | Breast    |
| Squamous/Esophagus     | 2006 | 25 % | Test       | Squamous  | Squamous  | Squamous  |
| Squamous/Lung          | 2011 | 40 % | Test       | HCC       | Squamous  | Squamous  |
| Squamous/Anal          | 2011 | 25 % | Test       | CCA       | Bladder   | Bladder   |
| Squamous/Esophagus     | 2009 | 40 % | Test       | CCA       | Squamous  | Squamous  |
| Squamous/Anal          | 2009 | 50 % | Test       | HCC       | Squamous  | Squamous  |
| Squamous/Head and Neck | 2011 | 80 % | Test       | Bladder   | Bladder   | Squamous  |
| Squamous/Head and Neck | 2009 | 75 % | Test       | CCA       | Squamous  | Squamous  |
| Squamous/Head and Neck | 2005 | 50 % | Test       | Bladder   | Squamous  | Squamous  |
| Squamous/Esophagus     | 2011 | 60 % | Test       | HCC       | Squamous  | Squamous  |
| Squamous/Esophagus     | 2010 | 75 % | Test       | GC        | GC        | GC        |
| Squamous/Cervix        | 2011 | 95 % | Test       | GC        | GC        | GC        |
| Squamous/Head and Neck | 2008 | 75 % | Test       | Squamous  | Squamous  | Squamous  |
| Bladder                | 2007 | 35 % | Validation | Cirrhosis | CCA       | CCA       |
| Bladder                | 2005 | 50 % | Validation | Liver     | Bladder   | Bladder   |
| Bladder                | 2011 | 60 % | Validation | Bladder   | Bladder   | Bladder   |
| Bladder                | 2011 | 75 % | Validation | HCC       | Squamous  | Breast    |
| Bladder                | 2010 | 90 % | Validation | CCA       | Bladder   | Bladder   |
| CCA                    | 2011 | 75 % | Validation | Cirrhosis | CCA       | CCA       |
| CCA                    | 2001 | 85 % | Validation | Cirrhosis | Cirrhosis | Cirrhosis |



|           |      |      |            |           |           |           |
|-----------|------|------|------------|-----------|-----------|-----------|
| CCA       | 2002 | 80 % | Validation | CCA       | CCA       | Cirrhosis |
| CCA       | 2009 | 40 % | Validation | Liver     | Liver     | Liver     |
| CCA       | 2011 | 80 % | Validation | Cirrhosis | CCA       | GC        |
| Cirrhosis | 2011 | None | Validation | Cirrhosis | Cirrhosis | Cirrhosis |
| Cirrhosis | 2007 | None | Validation | Cirrhosis | Cirrhosis | Cirrhosis |
| Cirrhosis | 2004 | None | Validation | Cirrhosis | Cirrhosis | Cirrhosis |
| Cirrhosis | 2010 | None | Validation | CCA       | Liver     | Liver     |
| Cirrhosis | 2010 | None | Validation | Cirrhosis | Cirrhosis | Cirrhosis |
| CRC       | 2009 | 25 % | Validation | HCC       | Squamous  | Squamous  |
| CRC       | 2008 | 35 % | Validation | Liver     | CRC       | CRC       |
| CRC       | 2007 | 95 % | Validation | CRC       | CRC       | CRC       |
| CRC       | 2005 | 90 % | Validation | CRC       | CRC       | CRC       |
| CRC       | 2005 | 60 % | Validation | CRC       | CRC       | CRC       |
| GC        | 2008 | 25 % | Validation | Liver     | Squamous  | GC        |
| GC        | 2005 | 50 % | Validation | CCA       | CCA       | CCA       |
| GC        | 2007 | 90 % | Validation | HCC       | GC        | GC        |
| GC        | 2004 | 25 % | Validation | Liver     | CCA       | Pancreas  |
| GC        | 2010 | 35 % | Validation | GC        | GC        | GC        |
| HCC       | 2010 | 50 % | Validation | HCC       | HCC       | HCC       |
| HCC       | 2009 | 75 % | Validation | HCC       | HCC       | HCC       |
| HCC       | 2009 | 70 % | Validation | CCA       | Liver     | HCC       |
| HCC       | 2011 | 90 % | Validation | HCC       | HCC       | HCC       |
| HCC       | 2010 | 25 % | Validation | Cirrhosis | HCC       | HCC       |
| Liver     | 2005 | None | Validation | Liver     | Liver     | Liver     |
| Liver     | 2010 | None | Validation | Liver     | Liver     | Liver     |
| Liver     | 2010 | None | Validation | Liver     | Liver     | Liver     |
| Liver     | 2009 | None | Validation | Liver     | Liver     | Liver     |
| Liver     | 2005 | None | Validation | Liver     | Liver     | Liver     |
| Lung      | 2008 | 80 % | Validation | CCA       | Lung      | Lung      |
| Lung      | 2010 | 50 % | Validation | CCA       | Lung      | Lung      |

|                    |      |      |            |           |           |           |
|--------------------|------|------|------------|-----------|-----------|-----------|
| Lung               | 2002 | 70 % | Validation | CCA       | Lung      | Lung      |
| Lung               | 2007 | 50 % | Validation | CCA       | CCA       | CCA       |
| Lung               | 2001 | 90 % | Validation | CCA       | CCA       | Pancreas  |
| Breast             | 2007 | 50 % | Validation | Liver     | Breast    | Breast    |
| Breast             | 2011 | 25 % | Validation | Cirrhosis | Breast    | Pancreas  |
| Breast             | 2003 | 90 % | Validation | Squamous  | Squamous  | Breast    |
| Breast             | 2004 | 95 % | Validation | CCA       | Breast    | Breast    |
| Breast             | 2011 | 60 % | Validation | Liver     | Breast    | Breast    |
| Pancreas           | 2010 | 40 % | Validation | GC        | GC        | Pancreas  |
| Pancreas           | 2010 | 30 % | Validation | Liver     | CCA       | Pancreas  |
| Pancreas           | 2010 | 90 % | Validation | CCA       | CCA       | Pancreas  |
| Pancreas           | 2010 | 80 % | Validation | GC        | GC        | Pancreas  |
| Pancreas           | 2007 | 75 % | Validation | CCA       | Bladder   | Pancreas  |
| Squamous/Lung      | 2004 | 70 % | Validation | CCA       | Squamous  | Squamous  |
| Squamous/Cervix    | 2004 | 75 % | Validation | Squamous  | Squamous  | Breast    |
| Squamous/Esophagus | 2008 | 10 % | Validation | Squamous  | Squamous  | Squamous  |
| Squamous/Esophagus | 2009 | 50 % | Validation | CCA       | Cirrhosis | Cirrhosis |
| Squamous/Esophagus | 2011 | 50 % | Validation | Liver     | Squamous  | Squamous  |

## Supplementary Table S2

A complete list of selected microRNAs for the PRIM classifier, CCM classifier and CCM+CB classifier.

| MicroRNA   | CCM+CB | CCM | PRIM |
|------------|--------|-----|------|
| let.7c     | X      | X   | X    |
| let.7f     | X      | X   |      |
| miR.1      |        | X   |      |
| miR.9      | X      | X   |      |
| miR.10a    | X      | X   | X    |
| miR.10b    | X      | X   | X    |
| miR.17     |        | X   | X    |
| miR.18a    | X      | X   |      |
| miR.21     | X      |     | X    |
| miR.23b    | X      | X   | X    |
| miR.25     | X      | X   | X    |
| miR.27a    | X      | X   | X    |
| miR.27b    | X      |     | X    |
| miR.28.5p  | X      | X   |      |
| miR.29b    | X      | X   |      |
| miR.29c    | X      |     | X    |
| miR.31     | X      | X   |      |
| miR.33b    | X      | X   |      |
| miR.34a    | X      | X   | X    |
| miR.34c.5p | X      | X   |      |
| miR.92a    | X      | X   | X    |
| miR.98     | X      |     |      |
| miR.99b    | X      | X   | X    |
| miR.105    |        | X   |      |
| miR.106a   | X      |     |      |
| miR.107    | X      | X   | X    |
| miR.122    |        |     | X    |
| miR.128    | X      |     |      |
| miR.129.3p | X      | X   | X    |
| miR.129.5p |        | X   |      |
| miR.130b   | X      | X   | X    |
| miR.133a   | X      | X   | X    |
| miR.133b   | X      |     |      |
| miR.135a   | X      |     |      |
| miR.135b   | X      | X   | X    |
| miR.136    | X      | X   |      |
| miR.138    | X      | X   | X    |
| miR.139.3p | X      | X   |      |
| miR.139.5p | X      |     |      |
| miR.140.3p | X      | X   |      |

|             |   |   |   |
|-------------|---|---|---|
| miR.141     | X | X |   |
| miR.143     | X | X | X |
| miR.146b.5p | X |   |   |
| miR.147b    | X | X | X |
| miR.148a    |   |   | X |
| miR.149     | X | X |   |
| miR.152     | X | X |   |
| miR.181a    | X | X | X |
| miR.181c    | X | X | X |
| miR.182     | X | X | X |
| miR.187     | X | X | X |
| miR.190     |   | X | X |
| miR.191     | X | X | X |
| miR.192     | X | X | X |
| miR.193a.3p | X | X |   |
| miR.193a.5p | X |   |   |
| miR.196b    | X | X | X |
| miR.198     | X | X | X |
| miR.200a    | X | X |   |
| miR.200c    | X | X |   |
| miR.203     | X | X | X |
| miR.205     | X | X | X |
| miR.210     | X | X | X |
| miR.214     | X | X | X |
| miR.216a    | X |   |   |
| miR.217     |   |   | X |
| miR.221     | X | X | X |
| miR.223     | X | X | X |
| miR.224     | X | X | X |
| miR.296.3p  | X | X |   |
| miR.301b    | X |   |   |
| miR.302a    | X |   |   |
| miR.302b    | X | X | X |
| miR.302c    | X |   |   |
| miR.323.3p  | X | X | X |
| miR.324.3p  | X | X |   |
| miR.324.5p  | X | X |   |
| miR.331.5p  | X | X |   |
| miR.338.3p  | X | X | X |
| let.7b      | X | X |   |
| miR.342.3p  | X |   |   |
| miR.342.5p  | X | X |   |
| miR.362.3p  |   | X |   |
| miR.363     | X |   |   |
| miR.365     | X | X |   |
| miR.370     | X |   |   |

|             |   |   |   |
|-------------|---|---|---|
| miR.375     | X | X | X |
| miR.376a    |   | X |   |
| miR.379     | X | X | X |
| miR.381     | X | X |   |
| miR.411     | X | X |   |
| miR.423.5p  | X | X |   |
| miR.425     | X |   |   |
| miR.429     | X |   |   |
| miR.433     |   | X |   |
| miR.449a    | X |   |   |
| miR.449b    | X | X |   |
| miR.453     |   | X |   |
| miR.483.5p  | X | X |   |
| miR.484     |   | X | X |
| miR.494     | X |   |   |
| miR.501.3p  | X | X | X |
| miR.502.3p  | X | X |   |
| miR.505     |   |   | X |
| miR.508.3p  |   | X | X |
| miR.510     |   | X |   |
| miR.512.3p  |   | X |   |
| miR.515.5p  | X | X |   |
| miR.516b    | X | X |   |
| miR.517a    | X | X |   |
| miR.520a.5p |   | X |   |
| miR.526b    | X | X | X |
| miR.532.3p  | X | X | X |
| miR.532.5p  |   | X |   |
| miR.542.5p  | X |   |   |
| miR.545     | X | X |   |
| miR.548c.3p | X |   |   |
| miR.548c.5p | X |   |   |
| miR.548d.3p |   | X | X |
| miR.551b    |   | X |   |
| miR.582.3p  | X |   |   |
| miR.589     |   | X |   |
| miR.615.5p  | X | X | X |
| miR.616     | X |   |   |
| miR.625     | X | X |   |
| miR.627     | X | X |   |
| miR.628.5p  | X |   |   |
| miR.642     | X | X |   |
| miR.653     | X |   |   |
| miR.654.3p  | X |   |   |
| miR.655     | X | X | X |
| miR.671.3p  | X | X |   |

|              |   |   |   |
|--------------|---|---|---|
| miR.758      |   | X |   |
| miR.873      |   | X |   |
| miR.875.3p   | X |   |   |
| miR.885.5p   |   |   | X |
| miR.891a     | X | X |   |
| miR.346      |   | X |   |
| miR.492      | X | X |   |
| miR.509.3.5p | X |   |   |
| miR.511      |   | X |   |
| miR.517b     | X |   |   |
| miR.520f     | X |   |   |
